# Supplementary material for: Convergent Morphological Evolution in Silene Sect. Italicae (Caryophyllaceae) in the Mediterranean Basin
Source: Front Plant Sci. 2022 Jul 12;13:695958. doi: 10.3389/fpls.2022.695958 (PMC9319200; doi:10.3389/fpls.2022.695958)
Supplement: Supplementary Table 1 — List of the specimens used in this study together with their collection and lab numbers, the collector name, country of origin and Genbank number accessions for the plastid trnH-psbA, trnS-trnG and the nuclear ribosomal Internal Transcribed Spacer (ITS). [file Table_1.xlsx]

## Sheet: New
Species	Lab number	Collector	Collection number	Country	Herbarium	Voucher	trnH-psbA	trnS-trnG	Internal Transcribed Spacer (ITS)
S. andryalifolia	DJ249	Jeanmonod	521	Algeria	G	G00430262	OM907754	OM907969	KX449573
S. andryalifolia	DJ347	Jacquemoud & Jeanmonod	FJ 3243b	Spain	G	G00430263	KX439527	KX439573	KX449575
S. andryalifolia	DJ348	Valdés et al.	94/88	Spain	G	G00430264	OM907755	OM907970	KX449572
S. andryalifolia	DJ349	Jeanmonod	404	Algeria	G	G00430265	KX439528	KX439574	KX449991
S. andryalifolia	DJ350	Jeanmonod	346	Algeria	G	G00430266	KX439529	KX439575	KX449566
S. andryalifolia	SAND01	Jeanmonod	35c	Spain	G	G00430302	OM907756	OM907971	OM777452
S. andryalifolia	SAND07	Jeanmonod	39b	Spain	G	G00430308	OM907757	OM907972	KX449577
S. andryalifolia	SAND08	Lopez Latorre	870250	Spain	G	G00430309	OM907758	OM907973	OM777453
S. andryalifolia	SAND09	Schroecke & Schmid	SChr.126	Spain	G	G00430310	OM907759	OM907974	KX449571
S. andryalifolia	SAND10	Jeanmonod	37d	Spain	G	G00430311	OM907760	OM907975	OM777454
S. andryalifolia	SAND11	Jacquemoud & Jeanmonod	FJ3552d	Spain	G	G00430312	OM907761	OM907976	OM777455
S. andryalifolia	SAND13	Jeanmonod	34c	Spain	G	G00430314	OM907762	OM907977	KX449563
S. andryalifolia	SAND16	Jeanmonod	38c	Spain	G	G00430317	OM907763	OM907978	OM777456
S. andryalifolia	SAND18	Jeanmonod	38a	Spain	G	G00430319	OM907764	OM907979	OM777457
S. andryalifolia	SAND19	Jeanmonod	37f	Spain	G	G00430320	OM907765	OM907980	OM777458
S. andryalifolia	SAND23	Jeanmonod	34b	Spain	G	G00430270	OM907766	OM907981	KX449561
S. andryalifolia	SAND25	Jacquemoud & Jeanmonod	FJ3552b	Spain	G	G00430272	OM907767	OM907982	KX449568
S. andryalifolia	SAND26	Charpin	21039	Spain	G	G00430273	OM907768	OM907983	OM777459
S. andryalifolia	SAND28	Merxmüller & Oberwinkler	22763	Spain	G	G00430275	OM907769	OM907984	KX449557
S. andryalifolia	SAND29	Jacquemoud & Jeanmonod	FJ3252c	Spain	G	G00430276	OM907770	OM907985	KX449576
S. andryalifolia	SAND33	Jeanmonod	37a	Spain	G	G00430280	OM907771	OM907986	OM777460
S. andryalifolia	SAND34	Jeanmonod	37b	Spain	G	G00430281	OM907772	OM907987	OM777461
S. andryalifolia	SAND35	Jeanmonod	37c	Spain	G	G00430282	OM907773	OM907988	OM777462
S. andryalifolia	SAND39	Jeanmonod	38d	Spain	G	G00430286	OM907774	OM907989	OM777463
S. andryalifolia	SAND42	Jeanmonod	519	Algeria	G	G00430289	OM907775	OM907990	KX449570
S. andryalifolia	SAND44	Jeanmonod	523	Algeria	G	G00430291	OM907776	OM907991	KX449567
S. andryalifolia	SAND52	Jeanmonod	408	Algeria	G	G00430299	OM907777	OM907992	KX449565
S. andryalifolia	SAU05	Jeanmonod	517	Algeria	G	G00430325	OM907778	OM907993	KX449560
S. andryalifolia	SAU06	Jeanmonod	525	Algeria	G	G00430324	OM907779	OM907994	OM777464
S. andryalifolia	SAU07	Jeanmonod	539	Algeria	G	G00430323	OM907780	OM907995	KX449569
S. andryalifolia	SAU09	Jeanmonod	536	Algeria	G	G00430326	OM907781	OM907996	KX449574
S. aristidis	Sar01	Dubuis	15979	Algeria	G	HbG455021	OM907782	OM907997	JX403478
S. aristidis	Sar02	Jeanmonod	514	Algeria	G	HbG196462	OM907783	OM907998	JX403479
S. aristidis	Sar03	Jeanmonod	317	Algeria	G	HbG200328	OM907784	OM907999	JX403480
S. aristidis	Sar05	Jeanmonod	513	Algeria	G	HbG196463	OM907785	OM908000	JX403481
S. aristidis	Sar07	Jeanmonod	316	Algeria	G	HbG200435	OM907786	OM908001	JX403483
S. aristidis	Sar08	Jeanmonod	313	Algeria	G	HbG200438	OM907787	OM908002	JX403484
S. aristidis	Sar09	Jeanmonod	311	Algeria	G	HbG200440	OM907788	OM908003	JX403485
S. aristidis	Sar10	Jeanmonod	318	Algeria	G	G00200434	KX439530	OM908004	JX403486
S. aristidis	Sar12	Jeanmonod	315	Algeria	G	HbG200436	OM907789	OM908005	JX403487
S. auriculifolia	SAU04	Jeanmonod	110	Algeria	G	G00430332	KX439531	KX439576	KX449992
S. badaroi	DJ401	Bocquet et al.	15396	Italy	ZT	Bocquet-15396	KX439566	KX439602	KX450000
S. badaroi	DJ402	Crouzet	s.n.	France	silicagel	-	OM907936	OM908166	OM777506
S. badaroi	DJ439	Tison	s.n.	France	G	G00419987	OM907790	OM908006	OM777465
S. confertiflora	SH125	Frère Louis	s.n.	Syria	P	P05019234	KX438393	KX439033	KX449578
S. confertiflora	SH126	Frère Louis	s.n.	Syria	P	P05019238	KX438394	KX439034	KX449579
S. coutinhoi	DJ240	Jeanmonod	9	Spain	G	G00347784	KX438395	KX439035	KX449580
S. coutinhoi	DJ474	Jeanmonod	7	Spain	G	G00347805	KX438398	OM908007	OM777466
S. coutinhoi	DJ475	Jeanmonod	8	Spain	G	G00347804	KX438399	OM908008	OM777467
S. cythnia	Scy1	Du Pasquier & Schlüssel	56	Greece	G	G00347632	KX438403	KX439037	KX449582
S. cythnia	Scy11	Du Pasquier & Schlüssel	57	Greece	G	G00347633	KX438413	KX439042	KX449587
S. cythnia	Scy21	Du Pasquier & Schlüssel	58	Greece	G	G00347634	KX438423	KX439047	KX449592
S. cythnia	Scy31	Du Pasquier & Schlüssel	59	Greece	G	G00347635	KX438433	KX439052	KX449597
S. cythnia	Scy41	Du Pasquier & Schlüssel	60	Greece	G	G00347636	KX438443	KX439057	KX449602
S. cythnia	Scy51	Du Pasquier & Schlüssel	61	Greece	G	G00347637	KX438453	KX439062	KX449607
S. cythnia	Scy61	Du Pasquier & Schlüssel	62	Greece	G	G00347638	KX438463	KX439067	KX449612
S. cythnia	Scy71	Du Pasquier & Schlüssel	63	Greece	G	G00347639	KX438472	KX439073	KX449618
S. cythnia	Scy81	Du Pasquier & Schlüssel	64	Greece	G	G00347640	KX438482	KX439078	KX449623
S. damboldtiana	sd001	Du Pasquier et al.	126	Greece	G	G00347641	OM907791	OM908009	JX403432
S. damboldtiana	sd011	Du Pasquier et al.	128	Greece	G	G00347643	KX438506	KX439086	JX403437
S. damboldtiana	sd021	Du Pasquier et al.	130	Greece	G	G00347644	KX438516	KX439091	JX403441
S. damboldtiana	sd031	Du Pasquier et al.	131	Greece	G	G00347645	KX438525	KX439096	KX449632
S. damboldtiana	sd041	Du Pasquier et al.	133	Greece	G	G00347646	KX438533	KX439101	JX403448
S. damboldtiana	sd051	Du Pasquier et al.	134	Greece	G	G00347647	KX438541	KX439107	JX403453
S. damboldtiana	sd061	Du Pasquier et al.	139	Greece	G	G00347648	KX438550	KX439112	JX403457
S. damboldtiana	sd071	Du Pasquier et al.	142	Greece	G	G00347650	KX438560	KX439117	JX403462
S. damboldtiana	sd081	Du Pasquier et al.	143	Greece	G	G00347651	KX438570	KX439122	JX403465
S. damboldtiana	sd091	Du Pasquier et al.	144	Greece	G	G00347652	KX438578	KX439127	KX449638
S. damboldtiana	sd101	Du Pasquier et al.	146	Greece	G	G00347653	KX438585	KX439132	KX449639
S. fernandezii	DJ250	Jacquemoud & Jeanmonod	FJ 3223c	Spain	G	G00347845	KC466292	OM908011	KC466308
S. fernandezii	DJ251	Jacquemoud & Jeanmonod	FJ 3223b	Spain	G	G00347846	OM907792	OM908010	KC466309
S. fernandezii	DJ486	Jacquemoud & Jeanmonod	FJ3228	Spain	G	G00347847	KX439532	KX439577	KC466310
S. fernandezii	DJ488	Jacquemoud & Jeanmonod	FJ3223d	Spain	G	G00226649	KX439533	KX439578	KC466307
S. fruticosa	Sfr01	Kit Tan & Vold	9788	Greece	G	HbG456062	OM907793	OM908012	JX403488
S. fruticosa	Sfr03	Stamatiadou	6134	Greece	G	Stamatiadou-6134	OM907794	OM908013	JX403490
S. fruticosa	Sfr05	Leresche	381	Italy	G	G00419988	KX439534	OM908014	JX403492
S. fruticosa	Sfr09	Kit Tan & Vold	11629	Greece	G	HbG459056	OM907795	OM908015	JX403494
S. fruticosa	Sfr11	Charpin	26774	Greece	G	G00419992	OM907796	OM908016	JX403496
S. galataea	Sga01	Du Pasquier & Schlüssel	153	Cyprus	G	G00347671	KX438591	KX439137	KX449640
S. galataea	Sga02	Du Pasquier & Schlüssel	153	Cyprus	silicagel	-	KX438592	KX439138	KX449641
S. galataea	Sga03	Du Pasquier & Schlüssel	153	Cyprus	silicagel	-	KX438593	KX439139	KX449642
S. galataea	Sga04	Du Pasquier & Schlüssel	153	Cyprus	silicagel	-	KX438594	KX439140	KX449643
S. galataea	Sga05	Du Pasquier & Schlüssel	153	Cyprus	silicagel	-	KX438595	KX439141	KX449644
S. gazulensis	SG01	Lozano	1	Spain	silicagel	-	OM907797	OM908017	KX816512
S. gazulensis	SG02	Lozano	2	Spain	silicagel	-	OM907798	OM908018	KX816513
S. gazulensis	SG03	Lozano	3	Spain	silicagel	-	OM907799	OM908019	KX816514
S. gigantea	Sgi002	Du Pasquier & Schlüssel	66	Greece	G	G00347517	KX439609	KX439851	KX450006
S. gigantea	Sgi011	Du Pasquier & Schlüssel	67	Greece	G	G00347518	KX439613	KX439855	KX450010
S. gigantea	Sgi021	Du Pasquier & Schlüssel	69	Greece	G	G00347519	KX439618	KX439860	KX450015
S. gigantea	Sgi032	Du Pasquier & Schlüssel	71	Greece	G	G00347520	KX439624	KX439867	KX450021
S. gigantea	Sgi040	Du Pasquier & Schlüssel	73	Greece	G	G00347521	KX439629	KX439872	KX450026
S. gigantea	Sgi050	Du Pasquier & Schlüssel	75	Greece	G	G00347522	KX439634	KX439877	KX450031
S. gigantea	Sgi060	Du Pasquier & Schlüssel	76	Greece	G	G00347523	KX439639	KX439882	KX450036
S. gigantea	Sgi071	Du Pasquier & Schlüssel	78	Greece	G	G00347510	KX439645	KX439888	KX450041
S. gigantea	Sgi089	Du Pasquier & Schlüssel	80	Greece	G	G00347525	KX439653	KX439896	KX450049
S. gigantea	Sgi093	Du Pasquier & Schlüssel	80	Greece	silicagel	-	KX439657	KX439900	KX450053
S. gigantea	Sgi102	Du Pasquier	95	Greece	G	G00347512	KX439661	KX439904	KX450057
S. gigantea	Sgi110	Du Pasquier	105	Greece	G	G00347514	KX439664	KX439907	KX450060
S. gigantea	Sgi122	Du Pasquier et al.	107	Greece	G	G00347513	KX439671	KX439914	KX450067
S. gigantea	Sgi130	Du Pasquier et al.	110	Greece	G	G00347511	KX439674	KX439917	KX450070
S. gigantea	Sgi141	Du Pasquier et al.	118	Greece	G	G00347515	KX439680	KX439923	KX450076
S. gigantea	Sgi150	Du Pasquier et al.	120	Greece	G	G00347539	KX439684	KX439927	KX450080
S. gigantea	Sgi160	Du Pasquier et al.	121	Greece	G	G00347572	KX439689	KX439932	KX450085
S. gigantea	Sgi170	Du Pasquier et al.	123	Greece	G	G00347529	KX439694	KX439934	KX450090
S. gigantea	Sgi182	Du Pasquier et al.	129	Greece	G	G00347543	KX439698	KX439938	KX450094
S. gigantea	Sgi189	Du Pasquier et al.	135	Greece	G	G00347542	KX439703	KX439942	KX450098
S. gigantea	Sgi200	Du Pasquier et al.	136	Greece	G	G00347544	KX439709	KX439948	KX450104
S. gigantea	Sgi211	Du Pasquier et al.	137	Greece	G	G00347548	KX439715	KX439954	KX450110
S. gigantea	Sgi220	Du Pasquier et al.	140	Greece	G	G00347541	KX439719	KX439958	KX450114
S. gigantea	Sgi230	Du Pasquier et al.	147	Greece	G	G00347528	KX439724	KX439963	KX450118
S. gigantea	Sgi250	Du Pasquier et al.	149	Greece	G	G00347531	KX439737	KX439973	KX450129
S. gigantea	Sgi261	Du Pasquier et al.	151	Greece	G	G00347532	KX439743	KX439979	KX450135
S. gigantea	Sgi281	Du Pasquier & Schlüssel	155	Greece	G	G00347573	KX439753	KX439988	KX450145
S. gigantea	Sgi310	Du Pasquier & Schlüssel	161	Greece	G	G00347563	KX439767	KX440002	KX450159
S. gigantea	Sgi321	Du Pasquier & Fazan	170	Greece	G	G00347526	KX439773	KX440008	KX450165
S. gigantea	Sgi331	Du Pasquier & Fazan	197	Greece	G	G00347530	KX439778	KX440013	KX450169
S. gigantea	Sgi341	Du Pasquier & Fazan	201	Greece	G	Du Pasquier_201	KX439782	KX440017	KX450172
S. gigantea	Sgi353	Du Pasquier & Fazan	206	Greece	G	G00347540	KX439793	KX440027	KX450181
S. gigantea	Sgi360	Du Pasquier & Fazan	207	Greece	G	G00347538	KX439795	KX440029	KX450183
S. gigantea	Sgi371	Du Pasquier & Cusin	216	Greece	G	G00347575	KX439801	KX440035	KX450189
S. gigantea	Sgi386	Du Pasquier & Cusin	222	Greece	G	Du Pasquier_222	KX439812	KX440046	KX450195
S. gigantea	SH001	Hubert-Morath	12287	Turkey	G	G00347581	KX439830	KX440064	KX450201
S. gigantea	SH003	Hubert-Morath	2157	Turkey	G	G00347516	KX439831	KX440065	KX450202
S. gigantea	SH009	Strid	46798	Greece	G	G00347533	KX439834	KX440068	KX450205
S. gigantea	SH010	Rechinger	3283b	Greece	G	G00347546	KX439835	KX440069	KX450206
S. gigantea	SH014	Hartvig & Christiansen	8500	Greece	G	G00347534	KX439838	KX440072	KX450208
S. gigantea	SH038	Çirpici & Yildiz	102-3	Turkey	MUFE	MUFE12236	KX439843	KX440077	KX450210
S. gigantea	SH041	Greuter	4098S	Greece	G	Z000078799	KX439846	KX440079	KX450213
S. gigantea	SH127	Unkown	s.n.	Greece	MAIC	MAIC2632	KX439849	KX440080	KX450215
S. goulimyi	Sgo029	Du Pasquier & Schlüssel	72	Greece	G	G00347668	KX438596	KX439142	KX449645
S. goulimyi	Sgo030	Du Pasquier & Schlüssel	72	Greece	silicagel	-	KX438597	KX439143	KX449646
S. goulimyi	Sgo039	Du Pasquier & Schlüssel	74	Greece	G	G00347670	KX438601	KX439147	KX449650
S. goulimyi	Sgo040	Du Pasquier & Schlüssel	74	Greece	silicagel	-	KX438602	KX439148	KX449651
S. goulimyi	Sgo049	Du Pasquier & Schlüssel	81	Greece	G	G00347667	KX438606	KX439152	KX449655
S. goulimyi	Sgo050	Du Pasquier & Schlüssel	81	Greece	silicagel	-	KX438607	KX439153	KX449656
S. goulimyi	Sgo059	Du Pasquier & Schlüssel	82	Greece	G	G00347669	KX438611	KX439157	KX449660
S. goulimyi	Sgo060	Du Pasquier & Schlüssel	82	Greece	silicagel	-	KX438612	KX439158	KX449661
S. goulimyi	Sgo063	Du Pasquier & Schlüssel	82	Greece	silicagel	-	KX438615	KX439161	KX449664
S. hicesiae	SH01	Troia & Burgarella	1	Italy	silicagel	-	OM907800	OM908020	KX816515
S. hicesiae	SH02	Troia & Burgarella	2	Italy	silicagel	-	OM907801	OM908021	KX816516
S. hicesiae	SH03	Troia & Burgarella	3	Italy	silicagel	-	OM907802	OM908022	KX816517
S. hicesiae	SH04	Troia & Burgarella	4	Italy	silicagel	-	OM907803	OM908023	KX816518
S. hicesiae	SH06	Troia & Burgarella	6	Italy	silicagel	-	OM907804	OM908024	KX816519
S. hicesiae	SH07	Troia & Burgarella	7	Italy	silicagel	-	OM907805	OM908025	KX816520
S. hicesiae	SH08	Troia & Burgarella	8	Italy	silicagel	-	OM907806	OM908026	OM777468
S. hicesiae	SH09	Troia & Burgarella	9	Italy	silicagel	-	OM907807	OM908027	OM777469
S. hicesiae	SH10	Troia & Burgarella	10	Italy	silicagel	-	OM907808	OM908028	OM777470
S. hicesiae	SH12	Troia & Burgarella	12	Italy	silicagel	-	OM907809	OM908029	OM777471
S. hicesiae	SH13	Troia & Burgarella	13	Italy	silicagel	-	OM907810	OM908030	OM777472
S. hicesiae	SH15	Troia & Burgarella	15	Italy	silicagel	-	OM907811	OM908031	OM777473
S. hicesiae	SH16	Troia & Burgarella	16	Italy	silicagel	-	OM907812	OM908032	OM777474
S. hicesiae	SH17	Troia & Burgarella	17	Italy	silicagel	-	OM907813	OM908033	OM777475
S. hicesiae	SH18	Troia & Burgarella	18	Italy	silicagel	-	OM907814	OM908034	OM777476
S. hicesiae	SH19	Troia & Burgarella	19	Italy	silicagel	-	OM907815	OM908035	OM777477
S. hicesiae	SH20	Troia & Burgarella	20	Italy	silicagel	-	OM907816	OM908036	OM777478
S. hifacensis	AUB-A1b	Prentice	AUB-A1b	Spain	silicagel	-	OM907817	OM908037	KX816522
S. hifacensis	AUB-A2d	Prentice	AUB-A2d	Spain	silicagel	-	OM907818	OM908038	KX816531
S. hifacensis	AUB-A4d	Prentice	AUB-A4d	Spain	silicagel	-	OM907819	OM908039	KX816532
S. hifacensis	AUB-B10c	Prentice	AUB-B10c	Spain	silicagel	-	OM907820	OM908040	KX816521
S. hifacensis	AUB-B11b	Prentice	AUB-B11b	Spain	silicagel	-	OM907821	OM908041	KX816533
S. hifacensis	AUB-B8c	Prentice	AUB-B8c	Spain	silicagel	-	OM907822	OM908042	OM777479
S. hifacensis	AUB-B9a	Prentice	AUB-B9a	Spain	silicagel	-	OM907823	OM908043	OM777480
S. hifacensis	CAL-1d	Prentice	CAL-1d	Spain	silicagel	-	OM907824	OM908044	OM777481
S. hifacensis	CAL-2c	Prentice	CAL-2c	Spain	silicagel	-	OM907825	OM908045	KX816528
S. hifacensis	CAL-2d	Prentice	CAL-2d	Spain	silicagel	-	OM907826	OM908046	KX816529
S. hifacensis	ESB-2e	Prentice	ESB-2e	Spain	silicagel	-	OM907827	OM908047	OM777482
S. hifacensis	ESB-3b	Prentice	ESB-3b	Spain	silicagel	-	OM907828	OM908048	OM777483
S. hifacensis	ESB-4a	Prentice	ESB-4a	Spain	silicagel	-	OM907829	OM908049	KX816534
S. hifacensis	JUE-1b	Prentice	JUE-1b	Spain	silicagel	-	OM907830	OM908050	KX816523
S. hifacensis	JUE-2e	Prentice	JUE-2e	Spain	silicagel	-	OM907831	OM908051	OM777484
S. hifacensis	JUE-3d	Prentice	JUE-3d	Spain	silicagel	-	OM907832	OM908052	OM777485
S. hifacensis	JUE-4a	Prentice	JUE-4a	Spain	silicagel	-	OM907833	OM908053	KX816524
S. hifacensis	MOR-1	Prentice	MOR-1	Spain	silicagel	-	OM907834	OM908054	OM777486
S. hifacensis	MOR-2b	Prentice	MOR-2b	Spain	silicagel	-	OM907835	OM908055	OM777487
S. hifacensis	MOR-2n	Prentice	MOR-2n	Spain	silicagel	-	OM907836	OM908056	KX816530
S. hifacensis	MOR-3c	Prentice	MOR-3c	Spain	silicagel	-	OM907837	OM908057	OM777488
S. hifacensis	ROC-1b	Prentice	ROC-1b	Spain	silicagel	-	OM907838	OM908058	KX816525
S. hifacensis	ROC-2a	Prentice	ROC-2a	Spain	silicagel	-	OM907839	OM908059	KX816526
S. hifacensis	ROC-3e	Prentice	ROC-3e	Spain	silicagel	-	OM907840	OM908060	OM777489
S. hifacensis	ROC-4c	Prentice	ROC-4c	Spain	silicagel	-	OM907841	OM908061	OM777490
S. hifacensis	TAL-1b	Prentice	TAL-1b	Spain	silicagel	-	OM907842	OM908062	OM777491
S. hifacensis	TAL-1d	Prentice	TAL-1d	Spain	silicagel	-	OM907843	OM908063	OM777492
S. hifacensis	TAL-2g	Prentice	TAL-2g	Spain	silicagel	-	OM907844	OM908064	KX816527
S. hifacensis	TAL-3k	Prentice	TAL-3k	Spain	silicagel	-	OM907845	OM908065	OM777493
S. hifacensis	TAL-4n	Prentice	TAL-4n	Spain	silicagel	-	OM907846	OM908066	OM777494
S. hifacensis	TAL-4p	Prentice	TAL-4p	Spain	silicagel	-	OM907847	OM908067	OM777495
S. hifacensis	TAL-5a	Prentice	TAL-5a	Spain	silicagel	-	OM907848	OM908068	OM777496
S. hifacensis	TAL-5h	Prentice	TAL-5h	Spain	silicagel	-	OM907849	OM908069	OM777497
S. hifacensis	TAL-6b	Prentice	TAL-6b	Spain	silicagel	-	OM907850	OM908070	OM777498
S. hifacensis	TAL-6l	Prentice	TAL-6l	Spain	silicagel	-	OM907851	OM908071	OM777499
S. italica	DJ043	Charpin et al.	AC18005	Italy	G	G00347779	KX438630	KX439174	JX403398
S. italica	DJ044	Charpin et al.	AC12078	Italy	G	G00347771	KX438634	KX439178	JX403399
S. italica	DJ045	Podlech	22875	France	G	G00347776	KX438628	KX439172	JX403400
S. italica	DJ046	Jeanmonod	3354b	France	G	G00347735	KX438625	KX439169	JX403401
S. italica	DJ048	Charpin	AC24396	France	G	G00347775	KX438617	KX439162	JX403402
S. italica	DJ234	Nydegger	s.n.	France	G	G00347773	KX438619	KX439164	JX403403
S. italica	DJ237	Charpin	16192	France	G	G00347736	KX438624	KX439168	JX403404
S. italica	DJ238	Jeanmonod	FJ 3358c	France	G	G00347774	KX438627	KX439171	JX403405
S. italica	DJ253	Jeanmonod	s.n.	France	G	Jeanmonod_sn2000	KX438629	KX439173	JX403406
S. italica	DJ254	Charpin et al.	25170	Turkey	G	G00347755	KX438814	KX439351	JX403407
S. italica	DJ255	Strid	36240	Greece	G	G00347762	OM907852	OM908072	JX403408
S. italica	DJ256	Strid et al.	42170	Greece	G	G00347737	OM907853	KX439345	JX403409
S. italica	DJ257	Rechinger	48359	Iran	G	G00347726	OM907854	KX439364	JX403410
S. italica	DJ258	Pabot	s.n.	Syria	G	G00347727	KX438840	OM908073	JX403411
S. italica	DJ372	Strid et al.	31640	Greece	G	G00347764	KX438807	KX439347	JX403412
S. italica	DJ373	Charpin et al.	AC 18066	Italy	G	G00347777	OM907855	OM908074	JX403413
S. italica	DJ374	Charpin et al.	AC 18031	Italy	G	G00347729	KX438631	KX439175	JX403414
S. italica	DJ375	Charpin & Jeanmonod	AC 18133	Italy	G	G00347778	KX438632	KX439176	JX403415
S. italica	DJ376	Charpin et al.	AC 18093	Italy	G	G00347780	KX438633	KX439177	JX403416
S. italica	DJ378	Bocquet	9138	Italy	G	G00347772	KX438648	OM908075	JX403417
S. italica	DJ382	Jeanmonod	FJ 3358a	France	G	G00347770	KX438626	KX439170	JX403418
S. italica	DJ383	Jeanmonod	FJ 3359	France	G	G00347769	KX438621	KX439165	JX403419
S. italica	DJ384	Charpin	18877	France	G	G00347733	KX438622	KX439166	JX403420
S. italica	DJ385	Geissler	5767	France	G	G00347730	KX438623	KX439167	JX403421
S. italica	DJ400	Kit Tan & Vold	16195	Greece	G	G00347763	KX438806	KX439346	JX403422
S. italica	Sgo19	Du Pasquier & Schlüssel	19	Greece	G	G00347604	KX438675	KX439216	KX449699
S. italica	Sgo2	Du Pasquier & Schlüssel	65	Greece	G	G00347618	KX438665	KX439206	KX449689
S. italica	SH044	Yildiz et al.	142	Turkey	MUFE	MUFE12316	KX438820	KX439355	KX449836
S. italica	SH044b	Yildiz et al.	142	Turkey	MUFE	MUFE12316	KX438821	KX439356	KX449837
S. italica	SH045	Yildiz et al.	131-1	Turkey	MUFE	MUFE12297	KX438824	KX439358	KX449839
S. italica	SH046	Çirpici et al.	121-5	Turkey	MUFE	MUFE12280	KX438815	KX439352	KX449832
S. italica	SH048	Yildiz et al.	19-1	Turkey	MUFE	MUFE12054	KX438822	KX439357	KX449838
S. italica	SH049	Yildiz et al.	39-2	Turkey	MUFE	MUFE12094	KX438828	KX439360	KX449841
S. italica	SH059	Akman	311	Turkey	G	G00347741	KX438829	KX439361	KX449842
S. italica	SH074	Charpin	27681	Turkey	G	G00347759	KX438810	KX439350	KX449830
S. italica	SH075	Charpin et al.	25149	Turkey	G	G00347743	KX438816	KX439353	KX449833
S. italica	SH076	Nydegger	40432	Turkey	G	G00347750	KX438819	KX439354	KX449835
S. italica	SH080	Nydegger	14104	Turkey	G	G00347754	KX438808	KX439348	KX449829
S. italica	SH092	Fayvush et al.	87144	Armenia	W	W2009-18385	KX438837	KX439362	KX449845
S. italica	SH093	Oganesian et al.	80566	Armenia	W	W2009-09018	KX438838	KX439363	KX449846
S. italica	si001	Du Pasquier et al.	122	Greece	G	G00347597	KX438685	KX439226	KX449709
S. italica	si011	Du Pasquier et al.	124	Greece	G	G00347602	KX438690	KX439231	KX449714
S. italica	si015	Du Pasquier et al.	124	Greece	silicagel	-	KX438694	KX439235	KX449718
S. italica	si021	Du Pasquier et al.	125	Greece	G	G00347598	KX438697	KX439238	KX449721
S. italica	si031	Du Pasquier et al.	127	Greece	G	G00347595	KX438703	KX439244	KX449726
S. italica	si051	Du Pasquier et al.	138	Greece	G	G00347593	KX438708	KX439249	KX449731
S. italica	si061	Du Pasquier et al.	145	Greece	G	G00347592	KX438713	KX439254	KX449736
S. italica	si071	Du Pasquier & Schlüssel	77	Greece	G	G00347617	KX438680	KX439221	KX450041
S. italica	si101	Du Pasquier & Schlüssel	85	Greece	G	G00347625	KX438718	KX439259	KX449741
S. italica	si121	Du Pasquier	94	Greece	G	G00347622	KX438723	KX439264	KX449746
S. italica	si148	Du Pasquier	101	Greece	G	G00347603	KX438728	KX439269	KX449751
S. italica	si150	Du Pasquier	101	Greece	silicagel	-	KX438730	KX439271	KX449753
S. italica	si169	Du Pasquier	103	Greece	G	G00347631	KX438734	KX439274	KX449757
S. italica	si170	Du Pasquier	103	Greece	silicagel	-	KX438735	KX439275	KX449758
S. italica	si180	Du Pasquier	104	Greece	G	G00347613	KX438740	KX439280	KX449763
S. italica	si230	Du Pasquier et al.	114	Greece	G	G00347610	KX438745	KX439285	KX449768
S. italica	si240	Du Pasquier et al.	115	Greece	G	G00347607	KX438750	KX439290	KX449773
S. italica	si260	Du Pasquier et al.	117	Greece	G	G00347608	KX438754	KX439294	KX449777
S. italica	si280	Du Pasquier & Schlüssel	156	Greece	G	G00347601	KX438759	KX439299	KX449782
S. italica	si290	Du Pasquier & Schlüssel	158	Greece	G	G00347591	KX438764	KX439304	KX449787
S. italica	si300	Du Pasquier & Schlüssel	160	Greece	G	G00347600	KX438769	KX439309	KX449792
S. italica	si310	Du Pasquier & Schlüssel	162	Greece	G	G00347590	KX438774	KX439314	KX449797
S. italica	si340	Du Pasquier & Schlüssel	165	Greece	G	G00347599	KX438779	KX439319	KX449802
S. italica	si360	Du Pasquier & Schlüssel	167	Greece	G	G00347587	KX438785	KX439325	KX449808
S. italica	si370	Du Pasquier & Fazan	209	Greece	G	G00347627	KX438790	KX439330	KX449813
S. italica	si377	Du Pasquier & Fazan	200	Greece	G	G00347626	KX438797	KX439337	KX449820
S. italica	si391	Du Pasquier & Fazan	204	Greece	G	G00347628	KX438800	KX439340	KX449823
S. italica	si395	Du Pasquier & Fazan	204	Greece	silicagel	-	KX438804	KX439344	KX449827
S. italica	siA01	Jeanmonod & Naciri	8009	Italy	G	G00220736	KX438638	KX439181	KX449665
S. italica	siA05	Jeanmonod & Naciri	8009	Italy	Silicagel	-	KX438642	KX439185	KX449669
S. italica	siB01	Jeanmonod & Naciri	8020	Italy	G	G00220747	KX438643	KX439186	OM777500
S. italica	siB05	Jeanmonod & Naciri	8020	Italy	Silicagel	-	KX438647	KX439190	KX449672
S. italica	siC01	Jeanmonod & Naciri	8019	Italy	G	G00220746	KX438649	KX439191	KX449673
S. italica	siC05	Jeanmonod & Naciri	8019	Italy	Silicagel	-	KX438653	KX439195	KX449677
S. italica	siD01	Jeanmonod & Naciri	s.n.	Italy	G	-	KX438654	KX439196	KX449678
S. italica	siE01	Jeanmonod & Naciri	s.n.	Italy	G	G00220774	KX438659	KX439200	KX449683
S. italica	siE05	Jeanmonod & Naciri	8047	Italy	Silicagel	G00220773	KX438663	KX439204	KX449687
S. italica	siF01	Jeanmonod & Naciri	8049	Italy	G	G00220776	KX438664	KX439205	KX449688
S. longicilia	DJ242	Jeanmonod	28	Portugal	G	G00347820	KX439536	KX439581	KX449993
S. longicilia	DJ243	Jeanmonod	30 a	Portugal	G	G00347834	KX439537	KX439582	KX449994
S. longicilia	DJ457	Jeanmonod	19c	Portugal	G	G00347822	OM907856	OM908076	OM777501
S. mellifera	DJ047	Charpin et al.	AC16074	Spain	G	G00347872	KC466289	OM908077	KC466300
S. mellifera	DJ230	Jeanmonod	44b	Spain	G	G00347873	KC466290	OM908078	KC466294
S. mellifera	DJ232	Charpin & Loizeau	AC 22046	Spain	G	G00347875	OM907857	OM908079	KC466305
S. mellifera	DJ233	Valdés et al.	1735.88	Spain	G	G00347876	OM907858	OM908080	KC466306
S. mellifera	DJ491	Jacquemoud & Jeanmonod	FJ3295	Spain	G	G00347857	KC466291	OM908081	KC466302
S. mellifera	DJ494	Jeanmonod	85	Spain	G	G00347854	OM907859	OM908082	KC466295
S. mellifera	DJ495	Jeanmonod	84	Spain	G	G00347853	OM907860	OM908083	KC466303
S. mellifera	DJ497	Jeanmonod	51	Spain	G	G00347851	OM907861	OM908084	KC466296
S. mellifera	DJ499	Jeanmonod	53d	Spain	G	G00347859	OM907863	OM908085	OM777523
S. mellifera	DJ504	Jeanmonod	66	Spain	G	G00347864	OM907862	OM908086	KC466297
S. mellifera	DJ536	Jeanmonod	47	Spain	G	G00347885	OM907864	OM908088	OM777524
S. mollissima	DJ441	Charpin & Hinz	AC19235	Spain	G	G00347905	KC466293	OM908089	KC466312
S. mollissima	SM01	Gradaille	1	Spain	silicagel	-	OM907865	OM908090	KC466313
S. mollissima	SM02	Gradaille	2	Spain	silicagel	-	OM907866	OM908091	KC466314
S. mollissima	SM03	Gradaille	3	Spain	silicagel	-	OM907867	OM908092	KC466315
S. mollissima	SM04	Gradaille	4	Spain	silicagel	-	OM907868	OM908093	KC466316
S. mollissima	SM05	Gradaille	5	Spain	silicagel	-	OM907869	OM908094	KC466317
S. mollissima	SM06	Gradaille	6	Spain	silicagel	-	OM907870	OM908095	KC466318
S. mollissima	SM07	Gradaille	7	Spain	silicagel	-	OM907871	OM908096	KC466319
S. mollissima	SM08	Gradaille	8	Spain	silicagel	-	OM907872	OM908097	KC466320
S. mollissima	SM09	Gradaille	9	Spain	silicagel	-	OM907873	OM908098	KC466321
S. mollissima	SM10	Gradaille	10	Spain	silicagel	-	OM907874	OM908099	KC466322
S. mollissima	SM11	Gradaille	11	Spain	silicagel	-	OM907875	OM908100	KC466323
S. mollissima	SM12	Gradaille	12	Spain	silicagel	-	OM907876	OM908101	KC466324
S. nemoralis	DJ252	Jeanmonod	FJ3329h	Spain	G	G00347877	KX438844	KX439370	KX449848
S. nemoralis	DJ340	Monserrat	s.n.	Spain	G	G00347702	KX438845	KX439371	KX449849
S. nemoralis	DJ388	Coste	s.n.	France	G	G00347698	KX438867	KX439392	KX449861
S. nemoralis	DJ390	Burnat	s.n.	Italy	G	G00347694	KX438855	KX439380	KX449856
S. nemoralis	DJ398	Coman	s.n.	Romania	G	G00347699	KX438910	KX439427	KX449897
S. nemoralis	SN702	Jeanmonod & Naciri	J7914	Austria	G	G00220567	KX438900	KX439420	KX449887
S. nemoralis	SN706	Jeanmonod & Naciri	J7914	Austria	silicagel	-	KX438903	KX439421	KX449890
S. nemoralis	SN707	Jeanmonod & Naciri	J7914	Austria	silicagel	-	KX438904	KX439422	KX449891
S. nemoralis	SN716	Jeanmonod & Naciri	J3915	Austria	silicagel	-	KX438905	KX439423	KX449892
S. nemoralis	SN717	Jeanmonod & Naciri	J3915	Austria	silicagel	-	KX438906	KX439424	KX449893
S. nemoralis	SN719	Jeanmonod & Naciri	J3915	Austria	silicagel	-	KX438908	KX439425	KX449895
S. nemoralis	SN720	Jeanmonod & Naciri	J3915	Austria	silicagel	-	KX438909	KX439426	KX449896
S. nemoralis	SN726	Jeanmonod & Naciri	J7920	Slovakia	G	G00220573	KX438911	KX439428	KX449898
S. nemoralis	SN727	Jeanmonod & Naciri	J7920	Slovakia	silicagel	-	KX438912	KX439429	KX449899
S. nemoralis	SN728	Jeanmonod & Naciri	J7920	Slovakia	silicagel	-	KX438913	KX439430	KX449900
S. nemoralis	SN730	Jeanmonod & Naciri	J7920	Slovakia	silicagel	-	KX438915	KX439431	KX449902
S. nemoralis	SN731	Jeanmonod & Naciri	J7920	Slovakia	silicagel	-	KX438916	KX439432	KX449903
S. nemoralis	SN732	Jeanmonod & Naciri	J7920	Slovakia	silicagel	-	KX438917	KX439433	KX449904
S. nemoralis	SN733	Jeanmonod & Naciri	J7920	Slovakia	silicagel	-	KX438918	KX439434	KX449905
S. nemoralis	SN734	Jeanmonod & Naciri	J7920	Slovakia	silicagel	-	KX438919	KX439435	KX449906
S. nemoralis	SN735	Jeanmonod & Naciri	J7920	Slovakia	silicagel	-	KX438920	KX439436	KX449907
S. nemoralis	SN738	Jeanmonod & Naciri	J7925	Slovakia	G	G00220578	KX438921	KX439437	KX449908
S. nemoralis	SN739	Jeanmonod & Naciri	J7925	Slovakia	silicagel	-	KX438922	KX439438	KX449909
S. nemoralis	SN741	Jeanmonod & Naciri	J7925	Slovakia	silicagel	-	KX438924	KX439439	KX449910
S. nemoralis	SN742	Jeanmonod & Naciri	J7925	Slovakia	silicagel	-	KX438925	KX439440	KX449911
S. nemoralis	SN746	Jeanmonod & Naciri	J7925	Slovakia	silicagel	-	KX438928	KX439442	KX449914
S. nemoralis	SN751	Jeanmonod & Naciri	J7933	Romania	G	G00220586	KX438895	KX439418	KX449882
S. nemoralis	SN754	Jeanmonod & Naciri	J7933	Romania	silicagel	-	KX438898	KX439419	KX449885
S. nemoralis	SN758	Jeanmonod & Naciri	J7935	Romania	silicagel	-	KX438887	KX439408	KX449875
S. nemoralis	SN763	Jeanmonod & Naciri	J7935	Romania	silicagel	-	KX438888	KX439409	KX449876
S. nemoralis	SN765	Jeanmonod & Naciri	J7935	Romania	silicagel	-	KX438890	KX439411	KX449877
S. nemoralis	SN766	Jeanmonod & Naciri	J7935	Romania	silicagel	-	KX438891	KX439412	KX449878
S. nemoralis	SN769	Jeanmonod & Naciri	J7941	Romania	G	G00220594	KX438881	KX439404	KX449870
S. nemoralis	SN771	Jeanmonod & Naciri	J7941	Romania	silicagel	-	KX438883	KX439405	KX449872
S. nemoralis	SN772	Jeanmonod & Naciri	J7941	Romania	silicagel	-	KX438884	KX439406	KX449873
S. nemoralis	SN773	Jeanmonod & Naciri	J7941	Romania	silicagel	-	KX438885	KX439407	KX449874
S. nemoralis	SN783	Jeanmonod & Naciri	J7946	Romania	silicagel	-	KX438892	KX439415	KX449879
S. nemoralis	SN784	Jeanmonod & Naciri	J7946	Romania	G	G00220599	KX438893	KX439416	KX449880
S. nemoralis	SN785	Jeanmonod & Naciri	J7946	Romania	silicagel	-	KX438894	KX439417	KX449881
S. nemoralis	SN809	Jeanmonod & Naciri	J7977	Bosnia	silicagel	-	KX438869	KX439393	KX449862
S. nemoralis	SN811	Jeanmonod & Naciri	J7977	Bosnia	silicagel	-	KX438871	KX439395	KX449863
S. nemoralis	SN812	Jeanmonod & Naciri	J7977	Bosnia	silicagel	-	KX438872	KX439396	KX449864
S. nemoralis	SN813	Jeanmonod & Naciri	J7977	Bosnia	silicagel	-	KX438873	KX439397	KX449865
S. nemoralis	SN820	Jeanmonod & Naciri	J7982	Bosnia	silicagel	-	KX438874	KX439398	KX449866
S. nemoralis	SN823	Jeanmonod & Naciri	J7982	Bosnia	silicagel	-	KX438875	KX439399	KX449867
S. nemoralis	SN824	Jeanmonod & Naciri	J7982	Bosnia	silicagel	-	KX438876	KX439400	KX449868
S. nemoralis	SN825	Jeanmonod & Naciri	J7982	Bosnia	silicagel	-	KX438877	KX439401	KX449869
S. nemoralis	SN836	Jeanmonod & Naciri	J8002	Italy	G	G00220655	KX438860	KX439384	KX449857
S. nemoralis	SN-S1	Jeanmonod	s.n.	Italy	G	G00419993	KX438846	KX439372	KX449850
S. nemoralis	SN-S2	Jeanmonod	s.n.	Italy	silicagel	-	KX438847	KX439373	KX449851
S. nemoralis	SN-S3	Jeanmonod	s.n.	Italy	silicagel	-	KX438848	KX439374	KX449852
S. nemoralis	SN-S4	Jeanmonod	s.n.	Italy	silicagel	-	KX438849	KX439375	KX449853
S. nemoralis	SN-S5	Jeanmonod	s.n.	Italy	silicagel	-	KX438850	KX439376	KX449854
S. nemoralis	SN-S6	Jeanmonod	s.n.	Italy	silicagel	-	KX438851	KX439377	KX449855
S. niederi	Sni02	Du Pasquier et al.	150	Greece	G	G00347672	KX438940	KX439444	KX449915
S. niederi	Sni04	Du Pasquier et al.	150	Greece	silicagel	-	KX438942	KX439446	KX449917
S. niederi	Sni12	Du Pasquier et al.	152	Greece	G	G00347673	KX438944	KX439448	KX449919
S. niederi	Sni14	Du Pasquier et al.	152	Greece	silicagel	-	KX438946	KX439450	KX449921
S. niederi	Sni16	Du Pasquier et al.	152	Greece	silicagel	-	KX438948	KX439452	KX449923
S. nodulosa	DJ263	Jeanmonod et al.	J 4415	France	G	G00347794	KX439538	KX439583	KX816536
S. nodulosa	DJ386	Charpin et al.	AC 17765	Italy	G	G00347797	KX439539	KX439584	KX449996
S. nodulosa	DJ387	Charpin et al.	AC 17872	Italy	G	G00347798	OM907877	OM908102	KX816541
S. nodulosa	DJ403	Gamisans	s.n.	Italy	G	G00347796	OM907878	OM908103	KX816535
S. nodulosa	DJ404	Gamisans	1841	France	G	G00347792	OM907879	OM908104	KX816537
S. nodulosa	DJ415	Lambinon	79/403	France	G	G00347786	OM907880	OM908105	KX816538
S. nodulosa	DJ422	Burnat et al.	s.n.	France	G-BU	Bu s.n.	OM907881	OM908106	KX816540
S. nodulosa	DJ423	Bocquet	s.n.	France	ZT	Z17359	OM907882	OM908107	KX816539
S. nutans	DJ239	Jeanmonod	74	Spain	G	HbG162976	JX403536	JX403559	JX403423
S. nutans	DJ352	Charpin	23235	France	G	HbG411050	JX403537	JX403560	JX403424
S. nutans	DJ353	Schuhwerk	92/58	Germany	G	HbG443048	JX403538	JX403561	JX403425
S. nutans	DJ354	Aeschimann	4640	Switzerland	G	HbG367714	JX403539	JX403562	JX403426
S. oenotrieae	SoB4	Jeanmonod & Naciri	8040	Italy	G	G00220767	KY211682	KY211685	KY211687
S. oenotrieae	SoB5	Jeanmonod & Naciri	8040	Italy	silicagel	-	KY211683	KY211684	KY211686
S. paradoxa	Spa02	Jeanmonod & Zellweger	3713	France	G	HbG261869	OM907883	OM908108	JX403497
S. paradoxa	Spa04	Kit Tan & Vold	7207	Greece	G	G00456018	KX439544	OM908109	JX403499
S. paradoxa	Spa05	Baltisberger & Lenherr	80/1395	Serbia	ZT	Baltisberger_80/1395	KX439545	OM908110	JX403500
S. paradoxa	Spa07	Strid & Kit Tan	47455	Greece	G	G00419994	OM907884	OM908111	JX403502
S. paradoxa	Spa10	Jeanmonod	J5247	France	G	HbG375108	OM907885	OM908112	JX403505
S. paradoxa	Spa12	Strid	33922	Greece	G	HbG450665	OM907886	OM908113	JX403507
S. paradoxa	Spa14	Kit Tan & Vold	7758	Greece	G	HbG456080	OM907887	OM908114	JX403509
S. paradoxa	Spa15	Greuter	15646	Greece	G	G00271831	KX439540	KX439585	JX403510
S. paradoxa	Spa22	Saint-Lager	s.n.	Croatia	G	G00419989	KX439541	OM908115	JX403516
S. paradoxa	Spa25	Baldacci	157	Albany	G	G00419990	KX439542	OM908116	JX403517
S. paradoxa	Spa31	Aeschimann	4432	Italy	G	G00234800	KX439543	OM908117	JX403521
S. paradoxa	Spa33	Greuter et al.	15142	Greece	G	HbG171087	OM907888	OM908118	JX403523
S. patula	DJ002	Jeanmonod	607	Algeria	G	HbG200325	KX439546	KX439586	JX403343
S. patula	DJ005	Jeanmonod	541	Morocco	G	HbG156810	KX439547	KX439587	JX403344
S. patula	DJ006	Jeanmonod	142	Algeria	G	HbG198181	KX439548	KX439588	JX403345
S. patula	DJ011	Jeanmonod	371	Morocco	G	HbG156804	OM907889	OM908119	JX403346
S. patula	DJ013	Jeanmonod	458	Morocco	G	HbG162845	OM907890	OM908120	JX403347
S. patula	DJ019	Jeanmonod	163	Algeria	G	HbG198160	OM907891	OM908121	JX403348
S. patula	DJ020	Jeanmonod	176	Algeria	G	HbG196434	OM907892	OM908122	JX403349
S. patula	DJ022	Jeanmonod	324	Algeria	G	HbG200442	KX439549	KX439589	JX403350
S. patula	DJ023	Jeanmonod	509	Algeria	G	HbG196464	OM907893	OM908123	JX403351
S. patula	DJ024	Jeanmonod	527	Algeria	G	HbG198102	KX439550	KX439590	JX403352
S. patula	DJ025	Jeanmonod	223	Algeria	G	HbG200399	KX439551	KX439591	JX403353
S. patula	DJ027	Jeanmonod	276 bis	Algeria	G	HbG200353	OM907894	OM908124	JX403354
S. patula	DJ028	Jeanmonod	269	Algeria	G	HbG200395	OM907895	OM908125	JX403355
S. patula	DJ031	Jeanmonod	246	Algeria	G	HbG196489	OM907896	OM908126	JX403356
S. patula	DJ033	Jeanmonod	999	Morocco	G	HbG156567	OM907897	OM908127	JX403357
S. patula	DJ037	Jeanmonod	666	Morocco	G	HbG156785	OM907898	OM908128	JX403358
S. patula	DJ038	Jeanmonod	975	Morocco	G	HbG156582	KX439552	KX439592	JX403359
S. patula	DJ040	Jeanmonod	904	Morocco	G	HbG156753	OM907899	OM908129	JX403360
S. patula	DJ052	Jeanmonod	192	Algeria	G	HbG196423	OM907900	OM908130	JX403361
S. patula	DJ063	Jeanmonod	457	Algeria	G	HbG196443	KX439553	KX439593	JX403362
S. patula	DJ072	Jeanmonod	264	Algeria	G	HbG200414	OM907901	OM908131	JX403363
S. patula	DJ077	Jeanmonod	270	Algeria	G	HbG200394	OM907902	OM908132	JX403364
S. patula	DJ085	Jeanmonod	228	Algeria	G	HbG196493	OM907903	OM908133	JX403365
S. patula	DJ093	Jeanmonod	570	Algeria	G	HbG200322	OM907904	OM908134	JX403366
S. patula	DJ096	Jeanmonod	549	Algeria	G	HbG200468	KX439554	KX439594	JX403367
S. patula	DJ099	Jeanmonod	556	Algeria	G	HbG200453	OM907905	OM908135	JX403368
S. patula	DJ101	Jeanmonod	545	Algeria	G	HbG200330	OM907906	OM908136	JX403369
S. patula	DJ102	Jeanmonod	546	Algeria	G	HbG200437	OM907907	OM908137	JX403370
S. patula	DJ114	Jeanmonod	630	Algeria	G	HbG200497	OM907908	OM908138	JX403371
S. patula	DJ115	Jeanmonod	635	Algeria	G	HbG200495	OM907909	OM908139	JX403372
S. patula	DJ119	Jeanmonod	415	Algeria	G	HbG196441	OM907910	OM908140	JX403373
S. patula	DJ120	Jeanmonod	323	Algeria	G	HbG200441	OM907911	OM908141	JX403374
S. patula	DJ123	Jeanmonod	330	Algeria	G	HbG200446	OM907912	OM908142	JX403375
S. patula	DJ124	Jeanmonod	326	Algeria	G	HbG200444	OM907913	OM908143	JX403376
S. patula	DJ127	Jeanmonod	472	Algeria	G	HbG200315	KX439555	KX439595	JX403377
S. patula	DJ138	Jeanmonod	427	Algeria	G	HbG200303	OM907914	OM908144	JX403378
S. patula	DJ165	Charpin et al.	MAR158	Morocco	G	HbG156838	OM907915	OM908145	JX403379
S. patula	DJ168	Podlech	45402	Morocco	G	HbG368431	OM907916	OM908146	JX403381
S. patula	DJ182	Charpin et al.	MAR234	Morocco	G	HbG156634	OM907917	OM908147	JX403382
S. patula	DJ183	Charpin et al.	MAR192	Morocco	G	HbG175499	OM907918	OM908148	JX403383
S. patula	DJ185	Charpin et al.	MAR336	Morocco	G	HbG156596	OM907919	OM908149	JX403384
S. patula	DJ189	Charpin et al.	MAR310	Morocco	G	HbG156795	OM907920	OM908150	JX403385
S. patula	DJ195	Charpin et al.	MAR591	Morocco	G	HbG156814	OM907921	OM908151	JX403386
S. patula	DJ199	Charpin et al.	MAR617	Morocco	G	HbG156818	OM907922	OM908152	JX403387
S. patula	DJ212	Jacquemoud & Jeanmonod	MAR1077	Morocco	G	HbG156834	KX439556	KX439596	JX403388
S. patula	DJ213	Jacquemoud & Jeanmonod	MAR1074	Morocco	G	HbG156831	OM907923	OM908153	JX403389
S. patula	DJ271	Chautems	4118	Morocco	G	HbG301658	OM907924	OM908154	JX403390
S. patula	DJ278	Charpin et al.	MAR497	Morocco	G	HbG162833	OM907925	OM908155	JX403391
S. patula	DJ286	Charpin et al.	MAR816	Morocco	G	HbG162829	OM907926	OM908156	JX403392
S. patula	DJ287	Charpin et al.	MAR873	Morocco	G	HbG162165	OM907927	OM908157	JX403393
S. patula	DJ290	Charpin et al.	MAR782	Morocco	G	HbG162172	OM907928	OM908158	JX403394
S. patula	DJ306	Charpin et al.	MAR403	Morocco	G	HbG156730	KX439557	KX439597	JX403395
S. patula	DJ312	Charpin et al.	MAR405	Morocco	G	HbG156728	OM907923	OM908159	JX403396
S. rosulata	DJ246	Jeanmonod	255	Algeria	G	G00430333	KX439564	KX439600	KX449998
S. sieberi	Ssi002	Du Pasquier & Schüssel	51	Greece	G	G00347677	KX438952	KX439499	KX449925
S. sieberi	Ssi004	Du Pasquier & Schüssel	51	Greece	silicagel	-	KX438954	KX439501	KX449927
S. sieberi	Ssi011	Du Pasquier & Schüssel	52	Greece	G	G00347679	KX438956	KX439503	KX449929
S. sieberi	Ssi013	Du Pasquier & Schüssel	52	Greece	silicagel	-	KX438958	KX439505	KX449932
S. sieberi	Ssi015	Du Pasquier & Schüssel	52	Greece	silicagel	-	KX438960	KX439507	KX449933
S. sieberi	Ssi021	Du Pasquier & Schüssel	53	Greece	G	G00347678	KX438961	KX439508	KX449934
S. sieberi	Ssi023	Du Pasquier & Schüssel	53	Greece	silicagel	-	KX438963	KX439510	KX449936
S. sieberi	Ssi030	Du Pasquier & Schüssel	54	Greece	G	G00347675	KX438966	KX439513	KX449940
S. sieberi	Ssi032	Du Pasquier & Cusin	218	Greece	G	G00347781	KX438968	KX439515	KX449942
S. sieberi	Ssi034	Du Pasquier & Cusin	218	Greece	silicagel	-	KX438970	KX439517	KX449944
S. sieberi	Ssi036	Du Pasquier & Cusin	219	Greece	G	G00347676	KX438972	KX439519	KX449946
S. sieberi	Ssi037	Du Pasquier & Cusin	219	Greece	silicagel	-	KX438973	KX439520	KX449947
S. sieberi	Ssi039	Du Pasquier & Cusin	220	Greece	G	G00347674	KX438975	KX439522	KX449949
S. sieberi	Ssi041	Du Pasquier & Cusin	220	Greece	silicagel	-	KX438977	KX439524	KX449951
S. sieberi	Ssi043	Du Pasquier & Cusin	220	Greece	silicagel	-	KX438979	KX439526	KX449953
S. spinescens	spi002	Du Pasquier	88	Greece	G	G00347654	KX438992	KX439458	KX449954
S. spinescens	spi004	Du Pasquier	88	Greece	silicagel	-	KX438994	KX439460	KX449956
S. spinescens	spi011	Du Pasquier	89	Greece	G	G00347655	KX438996	KX439462	KX449958
S. spinescens	spi021	Du Pasquier	90	Greece	G	G00347656	KX438997	KX439463	KX449959
S. spinescens	spi031	Du Pasquier	91	Greece	G	G00347657	KX438998	KX439464	KX449960
S. spinescens	spi040	Du Pasquier	92	Greece	G	G00347658	KX439000	KX439466	KX449962
S. spinescens	spi049	Du Pasquier	93	Greece	G	G00347660	KX439005	KX439471	KX449967
S. spinescens	spi050	Du Pasquier	93	Greece	silicagel	-	KX439006	KX439472	KX449968
S. spinescens	spi052	Du Pasquier	97	Greece	G	G00347660	KX439008	KX439474	KX449970
S. spinescens	spi070	Du Pasquier	98	Greece	G	G00347662	KX439011	KX439477	KX449973
S. spinescens	spi080	Du Pasquier	99	Greece	G	G00347663	KX439016	KX439482	KX449978
S. spinescens	spi090	Du Pasquier	106	Greece	G	G00347664	KX439020	KX439485	KX449981
S. spinescens	spi100	Du Pasquier	109	Greece	G	G00347666	KX439024	KX439489	KX449985
S. tomentosa	STG81B	Cortes	B	Gibraltar	silicagel	-	OM907924	OM908160	KX816545
S. tomentosa	STG81C	Cortes	C	Gibraltar	silicagel	-	OM907925	OM908161	KX816548
S. tomentosa	STG81E	Cortes	E	Gibraltar	silicagel	-	OM907926	OM908162	OM777502
S. tomentosa	STG81G	Cortes	G	Gibraltar	silicagel	-	OM907927	OM908163	OM777503
S. tomentosa	STG81H	Cortes	H	Gibraltar	silicagel	-	OM907928	OM908164	OM777504
S. tomentosa	STG81K	Cortes	K	Gibraltar	silicagel	-	OM907935	OM908165	OM777505
S. velutina	SV01	Jeanmonod & Thiébaud	J5167	France	G	G00347838	OM907958	OM908188	KX816554
S. velutina	SV03	Thiébaud & Jeanmonod	T05815	France	G	G00347837	OM907959	OM908189	KX816549
S. velutina	SV09	Thiébaud & Jeanmonod	T05826	France	G	G00347843	OM907960	OM908190	KX816555
S. velutina	SV10	Thiébaud & Jeanmonod	T05815	France	G	G00347844	OM907961	OM908191	OM777521
S. velutina	SV12	Bocquet	16403	France	G	HbG314925	OM907962	OM908192	OM777522
S. velutina	SV-A1	Hugot	A1	France	silicagel	-	OM907937	OM908167	KX816556
S. velutina	SV-A2	Hugot	A2	France	silicagel	-	OM907938	OM908168	KX816557
S. velutina	SV-A3	Hugot	A3	France	silicagel	-	OM907939	OM908169	KX816550
S. velutina	SV-A4	Hugot	A4	France	silicagel	-	OM907940	OM908170	KX816551
S. velutina	SV-B	Hugot	B	France	silicagel	-	OM907941	OM908171	KX816552
S. velutina	SV-C	Hugot	C	France	silicagel	-	OM907942	OM908172	OM777507
S. velutina	SV-D1	Hugot	D1	France	silicagel	-	OM907943	OM908173	OM777508
S. velutina	SV-D2	Hugot	D2	France	silicagel	-	OM907944	OM908174	OM777509
S. velutina	SV-D3	Hugot	D3	France	silicagel	-	OM907945	OM908175	OM777510
S. velutina	SV-D6	Hugot	D6	France	silicagel	-	OM907946	OM908176	OM777511
S. velutina	SV-F1	Hugot	F1	France	silicagel	-	KX439568	KX439604	KX450002
S. velutina	SV-F2	Hugot	F2	France	silicagel	-	KX439569	KX439605	KX450003
S. velutina	SV-F3	Hugot	F3	France	silicagel	-	OM907947	OM908177	OM777512
S. velutina	SV-F4	Hugot	F4	France	silicagel	-	OM907948	OM908178	OM777513
S. velutina	SV-R3	Hugot	R3	France	silicagel	-	OM907949	OM908179	OM777514
S. velutina	SV-R4	Hugot	R4	France	silicagel	-	OM907950	OM908180	OM777515
S. velutina	SV-R5	Hugot	R5	France	silicagel	-	OM907951	OM908181	OM777516
S. velutina	SV-R6	Hugot	R6	France	silicagel	-	OM907952	OM908182	KX816553
S. velutina	SV-V1	Hugot	V1	France	silicagel	-	OM907953	OM908183	OM777517
S. velutina	SV-V2	Hugot	V2	France	silicagel	-	OM907954	OM908184	OM777518
S. velutina	SV-V3	Hugot	V3	France	silicagel	-	OM907955	OM908185	OM777519
S. velutina	SV-V4	Hugot	V4	France	silicagel	-	OM907956	OM908186	OM777520
S. velutina	SV-V5	Hugot	V5	France	silicagel	-	OM907957	OM908187	KX816558
S. viridiflora	Svir1	Barth	2491	Romania	G	G00419991	OM907963	OM908193	JX403427
S. viridiflora	Svir2	Jeanmonod & Schlüssel	J6920	France	G	G00001036	KX439570	OM908194	JX403428
S. viridiflora	Svir4	Kuzmanov	BK-74311	Bulgaria	G	HbG111155	OM907964	OM908195	JX403430
S. viridiflora	Svir5	Bocquet	9087	Greece	ZT	Bocquet-9087	KX439571	KX439606	JX403431
The sequences with Genebank numbers in bold were issued for this project (trnH-psbA: 43.8%; trnS-trnG: 46.0% ; ITS: 14.6%)
