# Supplementary material for: Convergent Morphological Evolution in Silene Sect. Italicae (Caryophyllaceae) in the Mediterranean Basin
Source: Front Plant Sci. 2022 Jul 12;13:695958. doi: 10.3389/fpls.2022.695958 (PMC9319200; doi:10.3389/fpls.2022.695958)
Supplement: Supplementary Table 2 — ESS values for the different parameters in the combined STACEY analysis. [file Table_2.XLSX]

## Sheet: Sheet1
COMBINED RUN	STATES	BURN-İN
combinedLogs_with 10%Burnin.log	5'670'100'000	0
STATISTIC	MEAN	ESS	TYPE
posterior	4722.09	1237	R
likelihood	-5649	774	R
prior	4168.36	302	R
smcCoalescent	6203.23	521	R
bdcGrowthRate.t:Species	58452	15325	R
relativeDeathRate.t:Species	0.92	4853	R
collapseWeight.t:Species	0.877	619	R
originHeight.t:Species	0.03326	79734	R
popPriorScale	0.0007187	619	R
PopSize	0.0007179	61950	R
NClusters	55.981	345	R
BirthDeathCollapseModel.t:Species	4206	310	R
TreeHeight.Species	0.01228	5364	R
TreeHeight.t:FINALaligned_ITS	0.01326	5981	R
TreeHeight.t:Concatenated_TrnHA_TrnSG	0.01289	5601	R
treeLikelihood.FINALaligned_ITS	-2473	481	R
treeLikelihood.Concatenated_TrnHA_TrnSG	-3177	4151	R
gammaShape.s:FINALaligned_ITS	0.04924	87665	R
gammaShape.s:Concatenated_TrnHA_TrnSG	0.219	100400	R
freqParameter.s:FINALaligned_ITS1	0.224	59597	R
freqParameter.s:FINALaligned_ITS2	0.271	19391	R
freqParameter.s:FINALaligned_ITS3	0.282	56615	R
freqParameter.s:FINALaligned_ITS4	0.223	59036	R
freqParameter.s:Concatenated_TrnHA_TrnSG1	0.416	56690	R
freqParameter.s:Concatenated_TrnHA_TrnSG2	0.133	57278	R
freqParameter.s:Concatenated_TrnHA_TrnSG3	0.122	29715	R
freqParameter.s:Concatenated_TrnHA_TrnSG4	0.329	58294	R
rateAC.s:FINALaligned_ITS	0.09958	72027	R
rateAC.s:Concatenated_TrnHA_TrnSG	1.279	44988	R
rateAG.s:FINALaligned_ITS	0.257	53892	R
rateAT.s:FINALaligned_ITS	0.375	15289	R
rateAT.s:Concatenated_TrnHA_TrnSG	0.93	58031	R
rateCG.s:FINALaligned_ITS	0.01973	53101	R
rateGT.s:FINALaligned_ITS	0.175	10858	R
ucldStdev.c:FINALaligned_ITS	0.195	8268	R
ucldStdev.c:Concatenated_TrnHA_TrnSG	0.827	2543	R
rate.c:FINALaligned_ITS.mean	0.988	7159	R
rate.c:FINALaligned_ITS.variance	0.09569	6488	R
rate.c:FINALaligned_ITS.coefficientOfVariation	0.205	7716	R
rate.c:Concatenated_TrnHA_TrnSG.mean	1.876	5963	R
rate.c:Concatenated_TrnHA_TrnSG.variance	3.431	4761	R
rate.c:Concatenated_TrnHA_TrnSG.coefficientOfVariation	0.989	2371	R
ucldMean.c:Concatenated_TrnHA_TrnSG	1.796	6794	R
